# Supplementary material
Source: Springer Nature journal article supplement (https://www.springermedizin.de/resource/supplementary/12911_2011_562_MOESM1_ESM.pdf/9525876)
Supplement: MOESM1 [file 9525876]

Tree-Learning (TR, Target, Attr)

TR: training examples

Target: target attribute

Attr: set of descriptive attributes

{

Create a Root node for the tree.

If TR have the same target attribute value  $t_i$ ,

Then Return the single-node tree, i.e. Root, with target attribute =  $t_i$

If Attr = empty (i.e. there is no descriptive attributes available),

Then Return the single-node tree, i.e. Root, with most common value of Target in TR

Otherwise

{

Select attribute A from Attr that best classify TR based on an entropy-based measure

Set A the attribute for Root

For each legal value of A,  $v_i$ , do

{

Add a branch below Root, corresponding to  $A = v_i$

Let  $TR_{v_i}$  **be the subset of TR that have**  $A = v_i$

If  $TR_{v_i}$  is empty,

Then add a leaf node below the branch with target value = most common value of Target in  $TR_{v_i}$

Else below the branch, add the subtree learned by

Tree-Learning( $TR_{v_i}$ , Target, Attr-{A})

}

}

Return (Root)

}
